# Supplementary material for: Exotic thermoelectric behavior in nitrogenated holey graphene
Source: Royal Society of Chemistry journal article supplement (doi:10.1039/c7ra03597g), 2017-01-01
Supplement: c7ra03597g1.pdf [file c7ra03597g1.pdf]

## Supplementary information for ‘Exotic thermoelectric behavior in nitrogenated holey graphene’

Yinchang Zhao,<sup>1,\*</sup> Zhenhong Dai,<sup>1,†</sup> Chao Lian,<sup>2,‡</sup> and Sheng Meng<sup>2,3,§</sup>

<sup>1</sup>*Department of Physics, Yantai University,  
Yantai 264005, People’s Republic of China*

<sup>2</sup>*Beijing National Laboratory for Condensed Matter Physics and Institute of Physics,  
Chinese Academy of Sciences, Beijing,  
100190, People’s Republic of China*

<sup>3</sup>*Collaborative Innovation Center of Quantum Matter,  
Beijing 100084, People’s Republic of China*

(Dated: March 21, 2017)

## S1. Phonon group velocities for nitrogenated holey graphene

Besides phonon scattering rates, another important factor determining thermal transport is phonon group velocity  $v_g = d\omega_\nu/dq$ , where  $\nu$  represents the  $\nu$ th branch within the whole first Brillouin zone. The phonon group velocity of all phonon modes within the first Brillouin zone as a function of frequency for nitrogenated holey graphene is plotted in Fig. S1. The maximum group velocities for three acoustic branches are about 2.50, 17.76, and 18.48 km/s, respectively. For most of optical modes, the maximum group velocities are in the range of 1.55 to 13.16 km/s. These values are much higher than those of CoSb<sub>3</sub> and IrSb. In view of  $\kappa_L \sim v_g^2$  in RTA, these relatively high group velocities support that the values of the re-scaled  $\kappa_L$  for nitrogenated holey graphene are two or three times higher than those of CoSb<sub>3</sub> and IrSb<sub>3</sub>, although the larger anharmonic three-phonon scattering rates are observed in nitrogenated holey graphene.

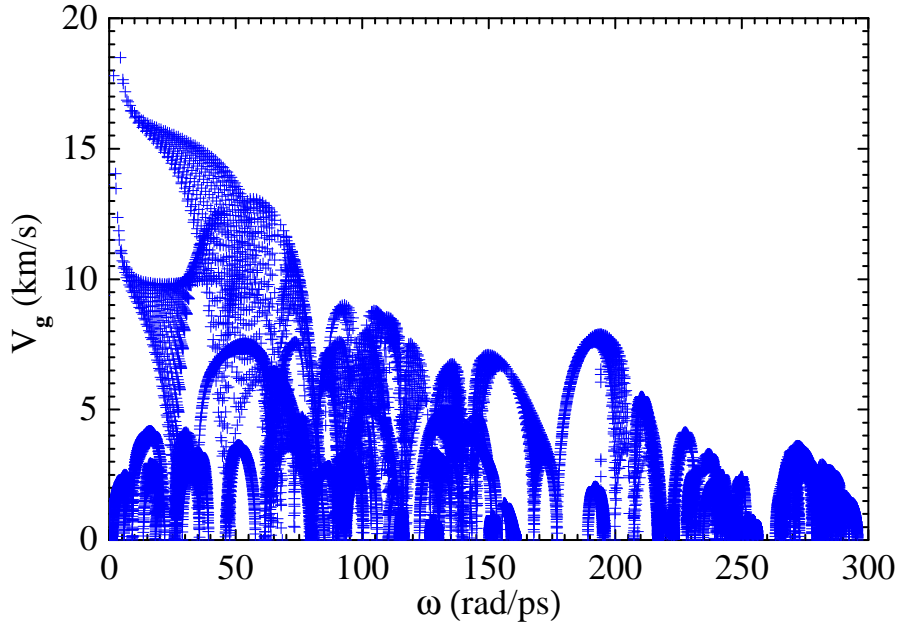

**FIG.S1.** (Color online). Phonon group velocities of all phonon modes within the first Brillouin zone as a function of frequency for nitrogenated holey graphene.

**S2. The doping concentration  $n$ , average electron-electron distance  $d$ , electron velocity  $v$ , and scattering time  $\tau$  for nitrogenated holey graphene**

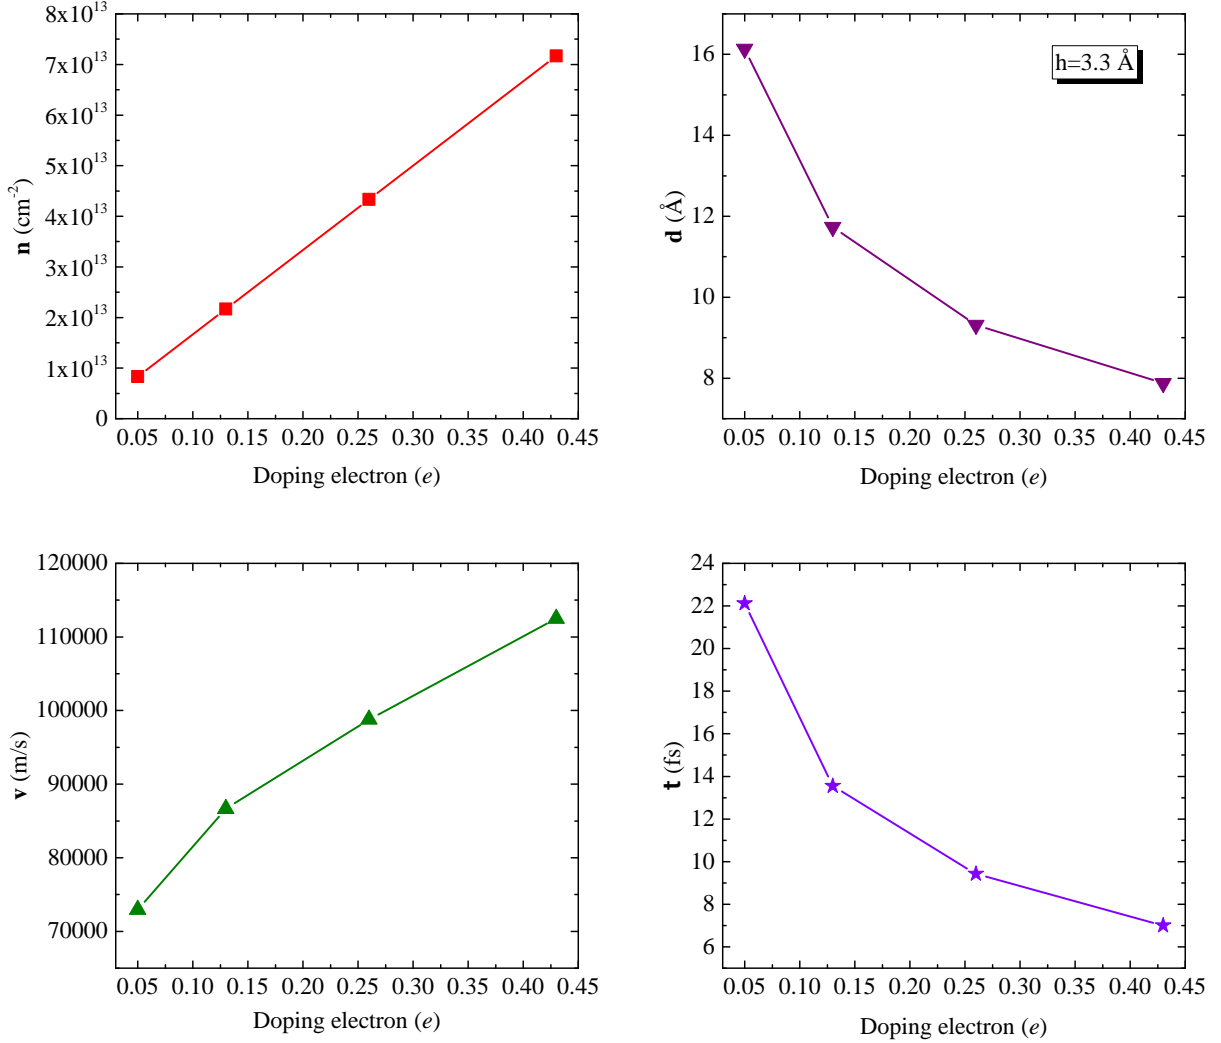

**FIG.S2.** (Color online). The doping concentration  $n$ , average electron-electron distance  $d$ , electron velocity  $v$ , and scattering time  $\tau$  as a function of doping electron  $e$  for nitrogenated holey graphene.

The model  $\tau \sim d/v$  is used to assess the amplitude of scattering time  $\tau$  for nitrogenated holey graphene, where  $d$  is the average electron-electron distance estimated by the doping concentration  $n$  and the effective thickness  $h \sim 3.30 \text{ \AA}$ ,  $v = \frac{1}{\hbar} \frac{\partial E(k)}{\partial k}$  represents the corresponding electron velocity. As shown in Fig.S2, in the  $n$ -type doping range of 0.05 to 0.43  $e$  in each primitive cell,  $n \sim 8.33 \times 10^{12}$  to  $7.17 \times 10^{13} \text{ cm}^{-2}$ ,  $d \sim 16.13$  to  $7.87 \text{ \AA}$ ,  $v \sim 7.30 \times 10^4$  to  $11.25 \times 10^4 \text{ m/s}$ , and  $\tau \sim 23$  to  $6 \text{ fs}$ . At  $n \sim 2.00 \times 10^{13} \text{ cm}^{-2}$ ,  $d \sim 12 \text{ \AA}$ ,  $v \sim 9.30 \times 10^4$

m/s, and thus  $\tau \sim 13$  fs. Therefore, it suitable to select the value of  $\tau = 13$  fs to calculate the electrical conductivity  $\sigma$  and electronic thermal conductivity  $\kappa_{el}$ . The values calculated with  $\tau = 6$  and 23 fs can be taken as the lower and upper limits of these parameters.

### S3. Structural stabilities of nitrogenated holey graphene

In order to study the structural stabilities of nitrogenated holey graphene with  $n$ -type doping at high temperature, *ab initio* molecular dynamics (MD) calculations are carried out. After 5000 steps (10 ps) MD at 1500 K, the nitrogenated holey graphene with doping concentration  $n \sim 2.00 \times 10^{13} \text{ cm}^{-2}$  keeps quite intact and have no any lattice destruction. In Fig.S3, we show the bond length evolution of nitrogenated holey graphene with  $n \sim 2.00 \times 10^{13} \text{ cm}^{-2}$  at 1500 K. The C-N, C-C1, and C-C2 bonds keep small fluctuations around their balanceable bond lengths.

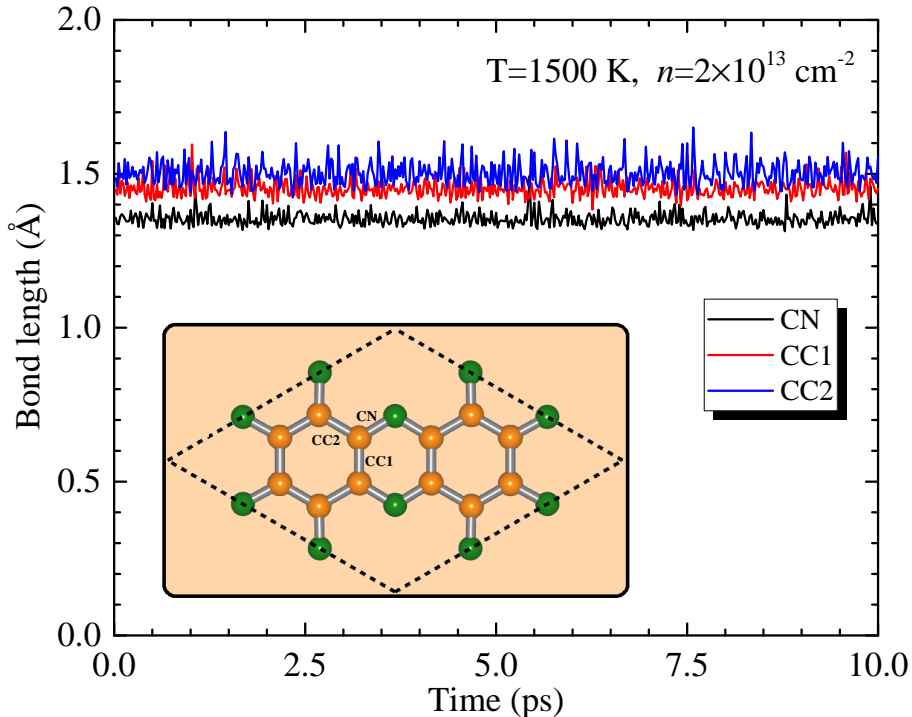

**FIG.S3.** (Color online). Bond length evolution at 1500 K for nitrogenated holey graphene with  $n$ -type doping concentration  $n \sim 2.00 \times 10^{13} \text{ cm}^{-2}$ . Inset shows the primitive cell labeled the C-N, C-C1, and C-C2 bonds.

---

\* y.zhao@ytu.edu.cn

† zhdai@ytu.edu.cn

‡ chaolian@iphy.ac.cn

§ smeng@iphy.ac.cn
